# Supplementary figures and images for: Prevalence of interferon type I signature in CD14 monocytes of patients with Sjögren's syndrome and association with disease activity and BAFF gene expression
Source: PubMed Central journal article supplement — Ann Rheum Dis. 2012 Jun 26;72(5):728–35. doi: 10.1136/annrheumdis-2012-201381 (PMC3618683; doi:10.1136/annrheumdis-2012-201381), 2012-06-26

**BAFF mRNA monocytes**

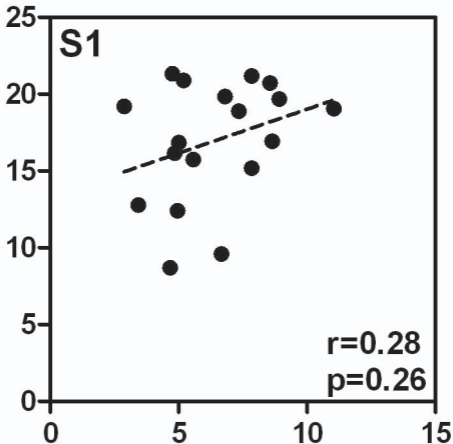

**BAFF mRNA PBMCs**

Supplement: annrheumdis-2012-201381-s1.pdf [file annrheumdis-2012-201381-s1.pdf]

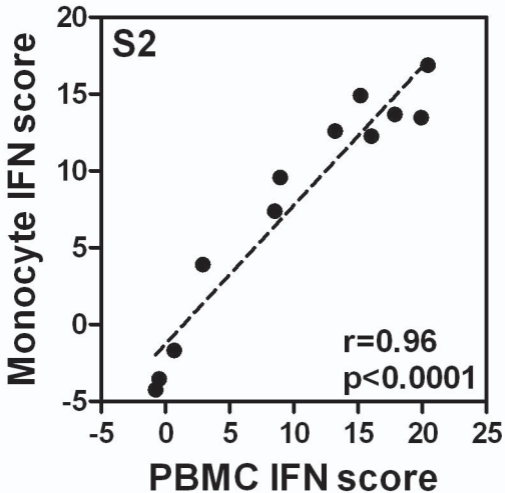

Supplement: annrheumdis-2012-201381-s2.pdf [file annrheumdis-2012-201381-s2.pdf]
